# Supplementary material for: DNA Barcoding for Efficient Species- and Pathovar-Level Identification of the Quarantine Plant Pathogen Xanthomonas
Source: PubMed Central journal article supplement (PMC5115671; doi:10.1371/journal.pone.0165995), 2016-11-18
Supplement: pone.0165995.s001.pdf [file pone.0165995.s001.pdf]

**S1 Table. Strains of *Xanthomonas* used in this study.**

| No. | Species/Pathovar                                    | Strain     | Source |
|-----|-----------------------------------------------------|------------|--------|
| 1   | <i>Xanthomonas albilineans</i>                      | DSM 3583   | DSMZ   |
| 2   | <i>Xanthomonas albilineans</i>                      | ICMP 196   | ICMP   |
| 3   | <i>Xanthomonas arboricola</i> pv. <i>pruni</i>      | ATCC 15924 | ATCC   |
| 4   | <i>Xanthomonas arboricola</i> pv. <i>celebensis</i> | ATCC 19045 | ATCC   |
| 5   | <i>Xanthomonas arboricola</i> pv. <i>celebensis</i> | DSM 50853  | DSMZ   |
| 6   | <i>Xanthomonas axonopodis</i> pv. <i>allii</i>      | LMG 578    | LMG    |
| 7   | <i>Xanthomonas axonopodis</i> pv. <i>allii</i>      | LMG 576    | LMG    |
| 8   | <i>Xanthomonas axonopodis</i> pv. <i>axonopodis</i> | DSM 3585   | DSMZ   |
| 9   | <i>Xanthomonas axonopodis</i> pv. <i>axonopodis</i> | LMG 539    | LMG    |
| 10  | <i>Xanthomonas axonopodis</i> pv. <i>begoniae</i>   | DSM 50850  | DSMZ   |
| 11  | <i>Xanthomonas axonopodis</i> pv. <i>begoniae</i>   | LMG 550    | LMG    |
| 12  | <i>Xanthomonas axonopodis</i> pv. <i>begoniae</i>   | LMG 553    | LMG    |
| 13  | <i>Xanthomonas axonopodis</i> pv. <i>betlicola</i>  | ATCC 11677 | ATCC   |
| 14  | <i>Xanthomonas axonopodis</i> pv. <i>betlicola</i>  | LMG 555    | LMG    |
| 15  | <i>Xanthomonas axonopodis</i> pv. <i>betlicola</i>  | ICMP 312   | ICMP   |
| 16  | <i>Xanthomonas axonopodis</i> pv. <i>citri</i>      | 1          | CAIQ   |
| 17  | <i>Xanthomonas axonopodis</i> pv. <i>citri</i>      | 2          | CAIQ   |
| 18  | <i>Xanthomonas axonopodis</i> pv. <i>citri</i>      | 3          | CAIQ   |
| 19  | <i>Xanthomonas axonopodis</i> pv. <i>citri</i>      | 4          | CAIQ   |
| 20  | <i>Xanthomonas axonopodis</i> pv. <i>citri</i>      | 5          | CAIQ   |
| 21  | <i>Xanthomonas axonopodis</i> pv. <i>citri</i>      | 6          | CAIQ   |
| 22  | <i>Xanthomonas axonopodis</i> pv. <i>citri</i>      | 7          | CAIQ   |
| 23  | <i>Xanthomonas axonopodis</i> pv. <i>citri</i>      | 8          | CAIQ   |
| 24  | <i>Xanthomonas axonopodis</i> pv. <i>citri</i>      | 9          | CAIQ   |
| 25  | <i>Xanthomonas axonopodis</i> pv. <i>citri</i>      | 11         | CAIQ   |
| 26  | <i>Xanthomonas axonopodis</i> pv. <i>citri</i>      | 12         | CAIQ   |
| 27  | <i>Xanthomonas axonopodis</i> pv. <i>citri</i>      | FZ01       | CAIQ   |
| 28  | <i>Xanthomonas axonopodis</i> pv. <i>citri</i>      | GJ1-Y-2    | CAIQ   |
| 29  | <i>Xanthomonas axonopodis</i> pv. <i>citri</i>      | GJ2-Y-3    | CAIQ   |
| 30  | <i>Xanthomonas axonopodis</i> pv. <i>citri</i>      | GJ3-G-1    | CAIQ   |
| 31  | <i>Xanthomonas axonopodis</i> pv. <i>citri</i>      | X206-5     | CAIQ   |
| 32  | <i>Xanthomonas axonopodis</i> pv. <i>citri</i>      | Xac-02     | CAIQ   |
| 33  | <i>Xanthomonas axonopodis</i> pv. <i>citri</i>      | YG201      | CAIQ   |
| 34  | <i>Xanthomonas axonopodis</i> pv. <i>citri</i>      | YG202      | CAIQ   |
| 35  | <i>Xanthomonas axonopodis</i> pv. <i>citri</i>      | YG206      | CAIQ   |
| 36  | <i>Xanthomonas axonopodis</i> pv. <i>citri</i>      | YG208      | CAIQ   |
| 37  | <i>Xanthomonas axonopodis</i> pv. <i>citri</i>      | YG209      | CAIQ   |
| 38  | <i>Xanthomonas axonopodis</i> pv. <i>citri</i>      | YG210      | CAIQ   |
| 39  | <i>Xanthomonas axonopodis</i> pv. <i>citri</i>      | YG212      | CAIQ   |
| 40  | <i>Xanthomonas axonopodis</i> pv. <i>citri</i>      | YG213      | CAIQ   |

| No. | Species/Pathovar                               | Strain | Source |
|-----|------------------------------------------------|--------|--------|
| 41  | <i>Xanthomonas axonopodis</i> pv. <i>citri</i> | YG214  | CAIQ   |
| 42  | <i>Xanthomonas axonopodis</i> pv. <i>citri</i> | YG215  | CAIQ   |
| 43  | <i>Xanthomonas axonopodis</i> pv. <i>citri</i> | YG220  | CAIQ   |
| 44  | <i>Xanthomonas axonopodis</i> pv. <i>citri</i> | YG221  | CAIQ   |
| 45  | <i>Xanthomonas axonopodis</i> pv. <i>citri</i> | YG222  | CAIQ   |
| 46  | <i>Xanthomonas axonopodis</i> pv. <i>citri</i> | YG223  | CAIQ   |
| 47  | <i>Xanthomonas axonopodis</i> pv. <i>citri</i> | YG226  | CAIQ   |
| 48  | <i>Xanthomonas axonopodis</i> pv. <i>citri</i> | YG230  | CAIQ   |
| 49  | <i>Xanthomonas axonopodis</i> pv. <i>citri</i> | YG231  | CAIQ   |
| 50  | <i>Xanthomonas axonopodis</i> pv. <i>citri</i> | YG232  | CAIQ   |
| 51  | <i>Xanthomonas axonopodis</i> pv. <i>citri</i> | YG233  | CAIQ   |
| 52  | <i>Xanthomonas axonopodis</i> pv. <i>citri</i> | YG234  | CAIQ   |
| 53  | <i>Xanthomonas axonopodis</i> pv. <i>citri</i> | YG235  | CAIQ   |
| 54  | <i>Xanthomonas axonopodis</i> pv. <i>citri</i> | YG236  | CAIQ   |
| 55  | <i>Xanthomonas axonopodis</i> pv. <i>citri</i> | YG237  | CAIQ   |
| 56  | <i>Xanthomonas axonopodis</i> pv. <i>citri</i> | YG238  | CAIQ   |
| 57  | <i>Xanthomonas axonopodis</i> pv. <i>citri</i> | YG239  | CAIQ   |
| 58  | <i>Xanthomonas axonopodis</i> pv. <i>citri</i> | YG240  | CAIQ   |
| 59  | <i>Xanthomonas axonopodis</i> pv. <i>citri</i> | YG242  | CAIQ   |
| 60  | <i>Xanthomonas axonopodis</i> pv. <i>citri</i> | YG243  | CAIQ   |
| 61  | <i>Xanthomonas axonopodis</i> pv. <i>citri</i> | YG245  | CAIQ   |
| 62  | <i>Xanthomonas axonopodis</i> pv. <i>citri</i> | YG246  | CAIQ   |
| 63  | <i>Xanthomonas axonopodis</i> pv. <i>citri</i> | YG247  | CAIQ   |
| 64  | <i>Xanthomonas axonopodis</i> pv. <i>citri</i> | YG248  | CAIQ   |
| 65  | <i>Xanthomonas axonopodis</i> pv. <i>citri</i> | YG250  | CAIQ   |
| 66  | <i>Xanthomonas axonopodis</i> pv. <i>citri</i> | YG251  | CAIQ   |
| 67  | <i>Xanthomonas axonopodis</i> pv. <i>citri</i> | YG252  | CAIQ   |
| 68  | <i>Xanthomonas axonopodis</i> pv. <i>citri</i> | YG253  | CAIQ   |
| 69  | <i>Xanthomonas axonopodis</i> pv. <i>citri</i> | YG254  | CAIQ   |
| 70  | <i>Xanthomonas axonopodis</i> pv. <i>citri</i> | YG255  | CAIQ   |
| 71  | <i>Xanthomonas axonopodis</i> pv. <i>citri</i> | YG256  | CAIQ   |
| 72  | <i>Xanthomonas axonopodis</i> pv. <i>citri</i> | YG257  | CAIQ   |
| 73  | <i>Xanthomonas axonopodis</i> pv. <i>citri</i> | YG258  | CAIQ   |
| 74  | <i>Xanthomonas axonopodis</i> pv. <i>citri</i> | YG259  | CAIQ   |
| 75  | <i>Xanthomonas axonopodis</i> pv. <i>citri</i> | YG260  | CAIQ   |
| 76  | <i>Xanthomonas axonopodis</i> pv. <i>citri</i> | YG261  | CAIQ   |
| 77  | <i>Xanthomonas axonopodis</i> pv. <i>citri</i> | YG262  | CAIQ   |
| 78  | <i>Xanthomonas axonopodis</i> pv. <i>citri</i> | YG264  | CAIQ   |
| 79  | <i>Xanthomonas axonopodis</i> pv. <i>citri</i> | YG265  | CAIQ   |
| 80  | <i>Xanthomonas axonopodis</i> pv. <i>citri</i> | YG266  | CAIQ   |
| 81  | <i>Xanthomonas axonopodis</i> pv. <i>citri</i> | YG267  | CAIQ   |
| 82  | <i>Xanthomonas axonopodis</i> pv. <i>citri</i> | YG270  | CAIQ   |

| No. | Species/Pathovar                                           | Strain     | Source |
|-----|------------------------------------------------------------|------------|--------|
| 83  | <i>Xanthomonas axonopodis</i> pv. <i>citri</i>             | YG271      | CAIQ   |
| 84  | <i>Xanthomonas axonopodis</i> pv. <i>citri</i>             | YG272      | CAIQ   |
| 85  | <i>Xanthomonas axonopodis</i> pv. <i>citri</i>             | YG274      | CAIQ   |
| 86  | <i>Xanthomonas axonopodis</i> pv. <i>citri</i>             | YG275      | CAIQ   |
| 87  | <i>Xanthomonas axonopodis</i> pv. <i>citri</i>             | YG276      | CAIQ   |
| 88  | <i>Xanthomonas axonopodis</i> pv. <i>citri</i>             | YG277      | CAIQ   |
| 89  | <i>Xanthomonas axonopodis</i> pv. <i>citri</i>             | YG278      | CAIQ   |
| 90  | <i>Xanthomonas axonopodis</i> pv. <i>citri</i>             | YG279      | CAIQ   |
| 91  | <i>Xanthomonas axonopodis</i> pv. <i>citri</i>             | YG280      | CAIQ   |
| 92  | <i>Xanthomonas axonopodis</i> pv. <i>citri</i>             | YG281      | CAIQ   |
| 93  | <i>Xanthomonas axonopodis</i> pv. <i>citri</i>             | YG282      | CAIQ   |
| 94  | <i>Xanthomonas axonopodis</i> pv. <i>citri</i>             | YG283      | CAIQ   |
| 95  | <i>Xanthomonas axonopodis</i> pv. <i>citri</i>             | YG284      | CAIQ   |
| 96  | <i>Xanthomonas axonopodis</i> pv. <i>citri</i>             | YG285      | CAIQ   |
| 97  | <i>Xanthomonas axonopodis</i> pv. <i>citri</i>             | YG286      | CAIQ   |
| 98  | <i>Xanthomonas axonopodis</i> pv. <i>citri</i>             | YG287      | CAIQ   |
| 99  | <i>Xanthomonas axonopodis</i> pv. <i>citri</i>             | YG288      | CAIQ   |
| 100 | <i>Xanthomonas axonopodis</i> pv. <i>citri</i>             | YG289      | CAIQ   |
| 101 | <i>Xanthomonas axonopodis</i> pv. <i>citri</i>             | YG290      | CAIQ   |
| 102 | <i>Xanthomonas axonopodis</i> pv. <i>citri</i>             | YG292      | CAIQ   |
| 103 | <i>Xanthomonas axonopodis</i> pv. <i>citri</i>             | YG293      | CAIQ   |
| 104 | <i>Xanthomonas axonopodis</i> pv. <i>citri</i>             | YG294      | CAIQ   |
| 105 | <i>Xanthomonas axonopodis</i> pv. <i>citri</i>             | YG295      | CAIQ   |
| 106 | <i>Xanthomonas axonopodis</i> pv. <i>citri</i>             | YG296      | CAIQ   |
| 107 | <i>Xanthomonas axonopodis</i> pv. <i>citri</i>             | YG297      | CAIQ   |
| 108 | <i>Xanthomonas axonopodis</i> pv. <i>citri</i>             | YG298      | CAIQ   |
| 109 | <i>Xanthomonas axonopodis</i> pv. <i>citri</i>             | YG299      | CAIQ   |
| 110 | <i>Xanthomonas axonopodis</i> pv. <i>citri</i>             | YG300      | CAIQ   |
| 111 | <i>Xanthomonas axonopodis</i> pv. <i>citri</i>             | YG301      | CAIQ   |
| 112 | <i>Xanthomonas axonopodis</i> pv. <i>citri</i>             | YG302      | CAIQ   |
| 113 | <i>Xanthomonas axonopodis</i> pv. <i>citri</i>             | YG303      | CAIQ   |
| 114 | <i>Xanthomonas axonopodis</i> pv. <i>citri</i>             | YG306      | CAIQ   |
| 115 | <i>Xanthomonas axonopodis</i> pv. <i>desmodii</i>          | LMG 692    | LMG    |
| 116 | <i>Xanthomonas axonopodis</i> pv. <i>desmodiigangetici</i> | LMG 693    | LMG    |
| 117 | <i>Xanthomonas axonopodis</i> pv. <i>glycines</i>          | ATCC 43911 | ATCC   |
| 118 | <i>Xanthomonas axonopodis</i> pv. <i>glycines</i>          | ICMP 5732  | ICMP   |
| 119 | <i>Xanthomonas axonopodis</i> pv. <i>khayae</i>            | NCPPB 536  | NCPPB  |
| 120 | <i>Xanthomonas axonopodis</i> pv. <i>manihotis</i>         | ATCC 23380 | ATCC   |
| 121 | <i>Xanthomonas axonopodis</i> pv. <i>manihotis</i>         | ICMP 5741  | ICMP   |
| 122 | <i>Xanthomonas axonopodis</i> pv. <i>martyniicola</i>      | NCPPB 1148 | NCPPB  |
| 123 | <i>Xanthomonas axonopodis</i> pv. <i>melhusii</i>          | NCPPB 479  | NCPPB  |
| 124 | <i>Xanthomonas axonopodis</i> pv. <i>phaseoli</i>          | ATCC 49119 | ATCC   |

| No. | Species/Pathovar                                           | Strain     | Source |
|-----|------------------------------------------------------------|------------|--------|
| 125 | <i>Xanthomonas axonopodis</i> pv. <i>phaseoli</i>          | JC2        | CAIQ   |
| 126 | <i>Xanthomonas axonopodis</i> pv. <i>phaseoli</i>          | JC6        | CAIQ   |
| 127 | <i>Xanthomonas axonopodis</i> pv. <i>phaseoli</i>          | SX1-1      | CAIQ   |
| 128 | <i>Xanthomonas axonopodis</i> pv. <i>phaseoli</i>          | SX1-2      | CAIQ   |
| 129 | <i>Xanthomonas axonopodis</i> pv. <i>phaseoli</i>          | SX2-3      | CAIQ   |
| 130 | <i>Xanthomonas axonopodis</i> pv. <i>phaseoli</i>          | YFS13-1    | CAIQ   |
| 131 | <i>Xanthomonas axonopodis</i> pv. <i>phaseoli</i>          | YFS13-2    | CAIQ   |
| 132 | <i>Xanthomonas axonopodis</i> pv. <i>phaseoli</i>          | YFS13-4    | CAIQ   |
| 133 | <i>Xanthomonas axonopodis</i> pv. <i>phaseoli</i>          | YFS13-5    | CAIQ   |
| 134 | <i>Xanthomonas axonopodis</i> pv. <i>phaseoli</i>          | YFS15-1    | CAIQ   |
| 135 | <i>Xanthomonas axonopodis</i> pv. <i>phaseoli</i>          | YFS15-2    | CAIQ   |
| 136 | <i>Xanthomonas axonopodis</i> pv. <i>phaseoli</i>          | YFS15-3    | CAIQ   |
| 137 | <i>Xanthomonas axonopodis</i> pv. <i>phaseoli</i>          | YFS15-4    | CAIQ   |
| 138 | <i>Xanthomonas axonopodis</i> pv. <i>phaseoli</i>          | YFS15-5    | CAIQ   |
| 139 | <i>Xanthomonas axonopodis</i> pv. <i>phaseoli</i>          | YJX1-4     | CAIQ   |
| 140 | <i>Xanthomonas axonopodis</i> pv. <i>phaseoli</i>          | YJX1-5     | CAIQ   |
| 141 | <i>Xanthomonas axonopodis</i> pv. <i>phaseoli</i>          | YJX1-7     | CAIQ   |
| 142 | <i>Xanthomonas axonopodis</i> pv. <i>phaseoli</i>          | ICMP 5834  | ICMP   |
| 143 | <i>Xanthomonas axonopodis</i> pv. <i>vasculorum</i>        | ATCC 13901 | ATCC   |
| 144 | <i>Xanthomonas axonopodis</i> pv. <i>vasculorum</i>        | ICMP 5757  | ICMP   |
| 145 | <i>Xanthomonas axonopodis</i> pv. <i>vesicatoria</i>       | NCPPB 1438 | NCPPB  |
| 146 | <i>Xanthomonas axonopodis</i> pv. <i>vesicatoria</i>       | NCPPB 2572 | NCPPB  |
| 147 | <i>Xanthomonas axonopodis</i> pv. <i>vesicatoria</i>       | NCPPB 2574 | NCPPB  |
| 148 | <i>Xanthomonas axonopodis</i> pv. <i>vesicatoria</i>       | NCPPB 2594 | NCPPB  |
| 149 | <i>Xanthomonas axonopodis</i> pv. <i>vesicatoria</i>       | NCPPB 936  | NCPPB  |
| 150 | <i>Xanthomonas axonopodis</i> pv. <i>vesicatoria</i>       | NCPPB 941  | NCPPB  |
| 151 | <i>Xanthomonas axonopodis</i> pv. <i>vignicola</i>         | ATCC 11648 | ATCC   |
| 152 | <i>Xanthomonas campestris</i> pv. <i>amaranthicola</i>     | LMG 498    | LMG    |
| 153 | <i>Xanthomonas campestris</i> pv. <i>amorphophalli</i>     | LMG 499    | LMG    |
| 154 | <i>Xanthomonas campestris</i> pv. <i>armoraciae</i>        | LMG 535    | LMG    |
| 155 | <i>Xanthomonas campestris</i> pv. <i>barbareae</i>         | LMG 547    | LMG    |
| 156 | <i>Xanthomonas campestris</i> pv. <i>betae</i>             | NCPPB 2592 | NCPPB  |
| 157 | <i>Xanthomonas campestris</i> pv. <i>campestris</i>        | NCPPB 528  | NCPPB  |
| 158 | <i>Xanthomonas campestris</i> pv. <i>cannabis</i>          | NCPPB 2876 | NCPPB  |
| 159 | <i>Xanthomonas campestris</i> pv. <i>euphorbiae</i>        | NCPPB 1828 | NCPPB  |
| 160 | <i>Xanthomonas campestris</i> pv. <i>fici</i>              | NCPPB 2372 | NCPPB  |
| 161 | <i>Xanthomonas campestris</i> pv. <i>mangiferaeindicae</i> | ATCC 11637 | ATCC   |
| 162 | <i>Xanthomonas campestris</i> pv. <i>mangiferaeindicae</i> | ICMP 5740  | ICMP   |
| 163 | <i>Xanthomonas campestris</i> pv. <i>musacearum</i>        | ATCC 49084 | ATCC   |
| 164 | <i>Xanthomonas campestris</i> pv. <i>musacearum</i>        | ICMP 2870  | ICMP   |
| 165 | <i>Xanthomonas cassavae</i>                                | ICMP 204   | ICMP   |
| 166 | <i>Xanthomonas cassavae</i>                                | LMG 671.1  | LMG    |

| No. | Species/Pathovar                                   | Strain     | Source |
|-----|----------------------------------------------------|------------|--------|
| 167 | <i>Xanthomonas cassavae</i>                        | LMG 673    | LMG    |
| 168 | <i>Xanthomonas citri</i> pv. <i>bauhiniae</i>      | LMG 548    | LMG    |
| 169 | <i>Xanthomonas citri</i> pv. <i>cajani</i>         | LMG 558    | LMG    |
| 170 | <i>Xanthomonas citri</i> subsp. <i>malvacearum</i> | ATCC 12131 | ATCC   |
| 171 | <i>Xanthomonas citri</i> subsp. <i>malvacearum</i> | DSM 1220   | DSMZ   |
| 172 | <i>Xanthomonas citri</i> subsp. <i>malvacearum</i> | DSM 3849   | DSMZ   |
| 173 | <i>Xanthomonas cucurbitae</i>                      | NCPPB 2597 | NCPPB  |
| 174 | <i>Xanthomonas cucurbitae</i>                      | NCPPB 3168 | NCPPB  |
| 175 | <i>Xanthomonas fragariae</i>                       | ATCC 29076 | ATCC   |
| 176 | <i>Xanthomonas fragariae</i>                       | NCPPB1469  | NCPPB  |
| 177 | <i>Xanthomonas fuscans</i> subsp. <i>fuscans</i>   | BH1-1      | CAIQ   |
| 178 | <i>Xanthomonas fuscans</i> subsp. <i>fuscans</i>   | CB1        | CAIQ   |
| 179 | <i>Xanthomonas fuscans</i> subsp. <i>fuscans</i>   | CB2        | CAIQ   |
| 180 | <i>Xanthomonas fuscans</i> subsp. <i>fuscans</i>   | CB3        | CAIQ   |
| 181 | <i>Xanthomonas fuscans</i> subsp. <i>fuscans</i>   | CB4        | CAIQ   |
| 182 | <i>Xanthomonas fuscans</i> subsp. <i>fuscans</i>   | G2-H2      | CAIQ   |
| 183 | <i>Xanthomonas fuscans</i> subsp. <i>fuscans</i>   | G2-H5      | CAIQ   |
| 184 | <i>Xanthomonas fuscans</i> subsp. <i>fuscans</i>   | G2-H6      | CAIQ   |
| 185 | <i>Xanthomonas fuscans</i> subsp. <i>fuscans</i>   | G2-R10     | CAIQ   |
| 186 | <i>Xanthomonas fuscans</i> subsp. <i>fuscans</i>   | G2-R11     | CAIQ   |
| 187 | <i>Xanthomonas fuscans</i> subsp. <i>fuscans</i>   | G2-R12     | CAIQ   |
| 188 | <i>Xanthomonas fuscans</i> subsp. <i>fuscans</i>   | G2-R13     | CAIQ   |
| 189 | <i>Xanthomonas fuscans</i> subsp. <i>fuscans</i>   | G2-R6      | CAIQ   |
| 190 | <i>Xanthomonas fuscans</i> subsp. <i>fuscans</i>   | G2-R8      | CAIQ   |
| 191 | <i>Xanthomonas fuscans</i> subsp. <i>fuscans</i>   | G2-X1      | CAIQ   |
| 192 | <i>Xanthomonas fuscans</i> subsp. <i>fuscans</i>   | G2-X2      | CAIQ   |
| 193 | <i>Xanthomonas fuscans</i> subsp. <i>fuscans</i>   | G2-X3      | CAIQ   |
| 194 | <i>Xanthomonas fuscans</i> subsp. <i>fuscans</i>   | G2-X4      | CAIQ   |
| 195 | <i>Xanthomonas fuscans</i> subsp. <i>fuscans</i>   | G2-X5      | CAIQ   |
| 196 | <i>Xanthomonas fuscans</i> subsp. <i>fuscans</i>   | G2-X8      | CAIQ   |
| 197 | <i>Xanthomonas fuscans</i> subsp. <i>fuscans</i>   | G2-Y11     | CAIQ   |
| 198 | <i>Xanthomonas fuscans</i> subsp. <i>fuscans</i>   | G2-Y5      | CAIQ   |
| 199 | <i>Xanthomonas fuscans</i> subsp. <i>fuscans</i>   | G2-Y6      | CAIQ   |
| 200 | <i>Xanthomonas fuscans</i> subsp. <i>fuscans</i>   | G2-Y7      | CAIQ   |
| 201 | <i>Xanthomonas fuscans</i> subsp. <i>fuscans</i>   | G2-Y9      | CAIQ   |
| 202 | <i>Xanthomonas fuscans</i> subsp. <i>fuscans</i>   | wilt2-1    | CAIQ   |
| 203 | <i>Xanthomonas fuscans</i> subsp. <i>fuscans</i>   | wilt2-2    | CAIQ   |
| 204 | <i>Xanthomonas fuscans</i> subsp. <i>fuscans</i>   | wilt2-3    | CAIQ   |
| 205 | <i>Xanthomonas fuscans</i> subsp. <i>fuscans</i>   | wilt2'-4   | CAIQ   |
| 206 | <i>Xanthomonas fuscans</i> subsp. <i>fuscans</i>   | ZB1-1      | CAIQ   |
| 207 | <i>Xanthomonas fuscans</i> subsp. <i>fuscans</i>   | ZB1-2      | CAIQ   |
| 208 | <i>Xanthomonas fuscans</i> subsp. <i>fuscans</i>   | ZB2-2      | CAIQ   |

| No. | Species/Pathovar                                 | Strain     | Source |
|-----|--------------------------------------------------|------------|--------|
| 209 | <i>Xanthomonas fuscans</i> subsp. <i>fuscans</i> | ZB2-3      | CAIQ   |
| 210 | <i>Xanthomonas fuscans</i> subsp. <i>fuscans</i> | ZH4-1      | CAIQ   |
| 211 | <i>Xanthomonas fuscans</i> subsp. <i>fuscans</i> | ZH4-2      | CAIQ   |
| 212 | <i>Xanthomonas hyacinthi</i>                     | DSM 50855  | DSMZ   |
| 213 | <i>Xanthomonas hyacinthi</i>                     | ATCC 12612 | ATCC   |
| 214 | <i>Xanthomonas oryzae</i> pv. <i>oryzae</i>      | 13LL115    | CAIQ   |
| 215 | <i>Xanthomonas oryzae</i> pv. <i>oryzae</i>      | 13LL124    | CAIQ   |
| 216 | <i>Xanthomonas oryzae</i> pv. <i>oryzae</i>      | 13LL125    | CAIQ   |
| 217 | <i>Xanthomonas oryzae</i> pv. <i>oryzae</i>      | 14LL116    | CAIQ   |
| 218 | <i>Xanthomonas oryzae</i> pv. <i>oryzae</i>      | 14LL141    | CAIQ   |
| 219 | <i>Xanthomonas oryzae</i> pv. <i>oryzae</i>      | 14LL142    | CAIQ   |
| 220 | <i>Xanthomonas oryzae</i> pv. <i>oryzae</i>      | 14LL143    | CAIQ   |
| 221 | <i>Xanthomonas oryzae</i> pv. <i>oryzae</i>      | 14LL144    | CAIQ   |
| 222 | <i>Xanthomonas oryzae</i> pv. <i>oryzae</i>      | 14LL145    | CAIQ   |
| 223 | <i>Xanthomonas oryzae</i> pv. <i>oryzae</i>      | 14LL149    | CAIQ   |
| 224 | <i>Xanthomonas oryzae</i> pv. <i>oryzae</i>      | 14LL150    | CAIQ   |
| 225 | <i>Xanthomonas oryzae</i> pv. <i>oryzae</i>      | 14LL153    | CAIQ   |
| 226 | <i>Xanthomonas oryzae</i> pv. <i>oryzae</i>      | 14LL155    | CAIQ   |
| 227 | <i>Xanthomonas oryzae</i> pv. <i>oryzae</i>      | 14LL168    | CAIQ   |
| 228 | <i>Xanthomonas oryzae</i> pv. <i>oryzae</i>      | 14LL177    | CAIQ   |
| 229 | <i>Xanthomonas oryzae</i> pv. <i>oryzae</i>      | 14LL180    | CAIQ   |
| 230 | <i>Xanthomonas oryzae</i> pv. <i>oryzae</i>      | 14LL183    | CAIQ   |
| 231 | <i>Xanthomonas oryzae</i> pv. <i>oryzae</i>      | 14LL185    | CAIQ   |
| 232 | <i>Xanthomonas oryzae</i> pv. <i>oryzae</i>      | GYC627     | CAIQ   |
| 233 | <i>Xanthomonas oryzae</i> pv. <i>oryzae</i>      | GYC629     | CAIQ   |
| 234 | <i>Xanthomonas oryzae</i> pv. <i>oryzae</i>      | RS50       | CAIQ   |
| 235 | <i>Xanthomonas oryzae</i> pv. <i>oryzae</i>      | RS61       | CAIQ   |
| 236 | <i>Xanthomonas oryzae</i> pv. <i>oryzae</i>      | PX009A     | CAIQ   |
| 237 | <i>Xanthomonas oryzae</i> pv. <i>oryzicola</i>   | 09YNB9-43  | CAIQ   |
| 238 | <i>Xanthomonas oryzae</i> pv. <i>oryzicola</i>   | 10CGY101   | CAIQ   |
| 239 | <i>Xanthomonas oryzae</i> pv. <i>oryzicola</i>   | 13LL105    | CAIQ   |
| 240 | <i>Xanthomonas oryzae</i> pv. <i>oryzicola</i>   | 13LL107    | CAIQ   |
| 241 | <i>Xanthomonas oryzae</i> pv. <i>oryzicola</i>   | 13LL121    | CAIQ   |
| 242 | <i>Xanthomonas oryzae</i> pv. <i>oryzicola</i>   | AHB2-11    | CAIQ   |
| 243 | <i>Xanthomonas oryzae</i> pv. <i>oryzicola</i>   | CGY103     | CAIQ   |
| 244 | <i>Xanthomonas oryzae</i> pv. <i>oryzicola</i>   | CGY104     | CAIQ   |
| 245 | <i>Xanthomonas oryzae</i> pv. <i>oryzicola</i>   | CGY105     | CAIQ   |
| 246 | <i>Xanthomonas oryzae</i> pv. <i>oryzicola</i>   | CGY106     | CAIQ   |
| 247 | <i>Xanthomonas oryzae</i> pv. <i>oryzicola</i>   | CGY107     | CAIQ   |
| 248 | <i>Xanthomonas oryzae</i> pv. <i>oryzicola</i>   | CGY108     | CAIQ   |
| 249 | <i>Xanthomonas oryzae</i> pv. <i>oryzicola</i>   | CGY109     | CAIQ   |
| 250 | <i>Xanthomonas oryzae</i> pv. <i>oryzicola</i>   | CGY111     | CAIQ   |

| No. | Species/Pathovar                               | Strain | Source |
|-----|------------------------------------------------|--------|--------|
| 251 | <i>Xanthomonas oryzae</i> pv. <i>oryzicola</i> | CGY112 | CAIQ   |
| 252 | <i>Xanthomonas oryzae</i> pv. <i>oryzicola</i> | CGY113 | CAIQ   |
| 253 | <i>Xanthomonas oryzae</i> pv. <i>oryzicola</i> | CGY116 | CAIQ   |
| 254 | <i>Xanthomonas oryzae</i> pv. <i>oryzicola</i> | CGY123 | CAIQ   |
| 255 | <i>Xanthomonas oryzae</i> pv. <i>oryzicola</i> | CGY124 | CAIQ   |
| 256 | <i>Xanthomonas oryzae</i> pv. <i>oryzicola</i> | CGY125 | CAIQ   |
| 257 | <i>Xanthomonas oryzae</i> pv. <i>oryzicola</i> | CGY126 | CAIQ   |
| 258 | <i>Xanthomonas oryzae</i> pv. <i>oryzicola</i> | CGY127 | CAIQ   |
| 259 | <i>Xanthomonas oryzae</i> pv. <i>oryzicola</i> | CGY128 | CAIQ   |
| 260 | <i>Xanthomonas oryzae</i> pv. <i>oryzicola</i> | CGY129 | CAIQ   |
| 261 | <i>Xanthomonas oryzae</i> pv. <i>oryzicola</i> | CGY130 | CAIQ   |
| 262 | <i>Xanthomonas oryzae</i> pv. <i>oryzicola</i> | CGY131 | CAIQ   |
| 263 | <i>Xanthomonas oryzae</i> pv. <i>oryzicola</i> | CGY132 | CAIQ   |
| 264 | <i>Xanthomonas oryzae</i> pv. <i>oryzicola</i> | CGY133 | CAIQ   |
| 265 | <i>Xanthomonas oryzae</i> pv. <i>oryzicola</i> | CGY134 | CAIQ   |
| 266 | <i>Xanthomonas oryzae</i> pv. <i>oryzicola</i> | CGY135 | CAIQ   |
| 267 | <i>Xanthomonas oryzae</i> pv. <i>oryzicola</i> | CGY136 | CAIQ   |
| 268 | <i>Xanthomonas oryzae</i> pv. <i>oryzicola</i> | CGY138 | CAIQ   |
| 269 | <i>Xanthomonas oryzae</i> pv. <i>oryzicola</i> | CGY139 | CAIQ   |
| 270 | <i>Xanthomonas oryzae</i> pv. <i>oryzicola</i> | GXB1-6 | CAIQ   |
| 271 | <i>Xanthomonas oryzae</i> pv. <i>oryzicola</i> | GYC602 | CAIQ   |
| 272 | <i>Xanthomonas oryzae</i> pv. <i>oryzicola</i> | GYC608 | CAIQ   |
| 273 | <i>Xanthomonas oryzae</i> pv. <i>oryzicola</i> | GYC610 | CAIQ   |
| 274 | <i>Xanthomonas oryzae</i> pv. <i>oryzicola</i> | GYC612 | CAIQ   |
| 275 | <i>Xanthomonas oryzae</i> pv. <i>oryzicola</i> | GYC613 | CAIQ   |
| 276 | <i>Xanthomonas oryzae</i> pv. <i>oryzicola</i> | GYC614 | CAIQ   |
| 277 | <i>Xanthomonas oryzae</i> pv. <i>oryzicola</i> | GYC615 | CAIQ   |
| 278 | <i>Xanthomonas oryzae</i> pv. <i>oryzicola</i> | GYC616 | CAIQ   |
| 279 | <i>Xanthomonas oryzae</i> pv. <i>oryzicola</i> | GYC617 | CAIQ   |
| 280 | <i>Xanthomonas oryzae</i> pv. <i>oryzicola</i> | GYC620 | CAIQ   |
| 281 | <i>Xanthomonas oryzae</i> pv. <i>oryzicola</i> | GYC636 | CAIQ   |
| 282 | <i>Xanthomonas oryzae</i> pv. <i>oryzicola</i> | GYC638 | CAIQ   |
| 283 | <i>Xanthomonas oryzae</i> pv. <i>oryzicola</i> | GYC645 | CAIQ   |
| 284 | <i>Xanthomonas oryzae</i> pv. <i>oryzicola</i> | GYC646 | CAIQ   |
| 285 | <i>Xanthomonas oryzae</i> pv. <i>oryzicola</i> | GYC647 | CAIQ   |
| 286 | <i>Xanthomonas oryzae</i> pv. <i>oryzicola</i> | GYC652 | CAIQ   |
| 287 | <i>Xanthomonas oryzae</i> pv. <i>oryzicola</i> | GYC656 | CAIQ   |
| 288 | <i>Xanthomonas oryzae</i> pv. <i>oryzicola</i> | GYC659 | CAIQ   |
| 289 | <i>Xanthomonas oryzae</i> pv. <i>oryzicola</i> | GYC661 | CAIQ   |
| 290 | <i>Xanthomonas oryzae</i> pv. <i>oryzicola</i> | GYC663 | CAIQ   |
| 291 | <i>Xanthomonas oryzae</i> pv. <i>oryzicola</i> | GYC664 | CAIQ   |
| 292 | <i>Xanthomonas oryzae</i> pv. <i>oryzicola</i> | GYC665 | CAIQ   |

| No. | Species/Pathovar                                       | Strain     | Source |
|-----|--------------------------------------------------------|------------|--------|
| 293 | <i>Xanthomonas oryzae</i> pv. <i>oryzicola</i>         | GYC669     | CAIQ   |
| 294 | <i>Xanthomonas oryzae</i> pv. <i>oryzicola</i>         | GYC670     | CAIQ   |
| 295 | <i>Xanthomonas oryzae</i> pv. <i>oryzicola</i>         | HANB1-25   | CAIQ   |
| 296 | <i>Xanthomonas oryzae</i> pv. <i>oryzicola</i>         | HNB16-100  | CAIQ   |
| 297 | <i>Xanthomonas oryzae</i> pv. <i>oryzicola</i>         | HNB16-97   | CAIQ   |
| 298 | <i>Xanthomonas oryzae</i> pv. <i>oryzicola</i>         | IJB01-25   | CAIQ   |
| 299 | <i>Xanthomonas oryzae</i> pv. <i>oryzicola</i>         | JSB3-28    | CAIQ   |
| 300 | <i>Xanthomonas oryzae</i> pv. <i>oryzicola</i>         | RS105      | CAIQ   |
| 301 | <i>Xanthomonas oryzae</i> pv. <i>oryzicola</i>         | RS60       | CAIQ   |
| 302 | <i>Xanthomonas oryzae</i> pv. <i>oryzicola</i>         | SCBO-1     | CAIQ   |
| 303 | <i>Xanthomonas oryzae</i> pv. <i>oryzicola</i>         | SCBO-7     | CAIQ   |
| 304 | <i>Xanthomonas oryzae</i> pv. <i>oryzicola</i>         | SCBO-8     | CAIQ   |
| 305 | <i>Xanthomonas oryzae</i> pv. <i>oryzicola</i>         | YNB1-3     | CAIQ   |
| 306 | <i>Xanthomonas oryzae</i> pv. <i>oryzicola</i>         | YNB7-34    | CAIQ   |
| 307 | <i>Xanthomonas oryzae</i> pv. <i>oryzicola</i>         | YNBO-1     | CAIQ   |
| 308 | <i>Xanthomonas oryzae</i> pv. <i>oryzicola</i>         | YNBO-10    | CAIQ   |
| 309 | <i>Xanthomonas oryzae</i> pv. <i>oryzicola</i>         | YNBO-11    | CAIQ   |
| 310 | <i>Xanthomonas oryzae</i> pv. <i>oryzicola</i>         | YNBO-12    | CAIQ   |
| 311 | <i>Xanthomonas oryzae</i> pv. <i>oryzicola</i>         | YNBO-13    | CAIQ   |
| 312 | <i>Xanthomonas oryzae</i> pv. <i>oryzicola</i>         | YNBO-14    | CAIQ   |
| 313 | <i>Xanthomonas oryzae</i> pv. <i>oryzicola</i>         | YNBO-15    | CAIQ   |
| 314 | <i>Xanthomonas oryzae</i> pv. <i>oryzicola</i>         | YNBO-2     | CAIQ   |
| 315 | <i>Xanthomonas oryzae</i> pv. <i>oryzicola</i>         | YNBO-4     | CAIQ   |
| 316 | <i>Xanthomonas oryzae</i> pv. <i>oryzicola</i>         | YNBO-7     | CAIQ   |
| 317 | <i>Xanthomonas oryzae</i> pv. <i>oryzicola</i>         | YNBO-8     | CAIQ   |
| 318 | <i>Xanthomonas oryzae</i> pv. <i>oryzicola</i>         | ZJBO1-21   | CAIQ   |
| 319 | <i>Xanthomonas populi</i>                              | LMG 5743   | LMG    |
| 320 | <i>Xanthomonas populi</i>                              | NCPPB 2951 | NCPPB  |
| 321 | <i>Xanthomonas populi</i>                              | NCPPB 3038 | NCPPB  |
| 322 | <i>Xanthomonas sacchari</i>                            | LMG 471    | LMG    |
| 323 | <i>Xanthomonas sacchari</i>                            | NCPPB 4341 | NCPPB  |
| 324 | <i>Xanthomonas</i> sp. pv. <i>alangii</i>              | LMG 470    | LMG    |
| 325 | <i>Xanthomonas translucens</i> pv. <i>arrhenatheri</i> | NCPPB 3229 | NCPPB  |
| 326 | <i>Xanthomonas translucens</i> pv. <i>arrhenatheri</i> | NCPPB 2699 | NCPPB  |
| 327 | <i>Xanthomonas vasicola</i> pv. <i>holcicola</i>       | NCPPB 2417 | NCPPB  |

ATCC, American Type Culture Collection

NCPPB, National Collection of Plant Pathogenic Bacteria

DSMZ, Deutsche Sammlung von Mikroorganismen und Zellkulturen

LMG, BCCM/LMG Bacteria Collection, Laboratory for Microbiology

ICMP, International Collection of Micro-organisms from Plants

CAIQ, Chinese Academy of Inspection and Quarantine
