# Supplementary material for: DNA Barcoding for Efficient Species- and Pathovar-Level Identification of the Quarantine Plant Pathogen Xanthomonas
Source: PubMed Central journal article supplement (PMC5115671; doi:10.1371/journal.pone.0165995), 2016-11-18
Supplement: pone.0165995.s002.pdf [file pone.0165995.s002.pdf]

**S2 Table. Additional *Xanthomonas* sequences obtained from GenBank**

| Species                                        | Gene          | No. <sup>a</sup> | Accession number                                                                                                                                                                                                                                                                   |
|------------------------------------------------|---------------|------------------|------------------------------------------------------------------------------------------------------------------------------------------------------------------------------------------------------------------------------------------------------------------------------------|
| <i>X. albilineans</i>                          | <i>cpn60</i>  | 1                | FP565176.1                                                                                                                                                                                                                                                                         |
| <i>X. arboricola</i> pv. <i>juglandis</i>      | <i>cpn60</i>  | 1                | CP012251.1                                                                                                                                                                                                                                                                         |
| <i>X. axonopodis</i> pv. <i>citri</i>          | <i>cpn60</i>  | 13               | AE008923.1;CP009028.1;CP009031.1;CP009034.1;CP009040.1;CP003778.1;CP009025.1;CP009019.1;CP009013.1;CP009007.1;CP009004.1;CP008992.1;CP004399.1                                                                                                                                     |
| <i>X. axonopodis</i> pv. <i>citrumelo</i>      | <i>cpn60</i>  | 1                | CP002914.1                                                                                                                                                                                                                                                                         |
| <i>X. axonopodis</i> pv. <i>dieffenbachiae</i> | <i>cpn60</i>  | 1                | CP014347.1                                                                                                                                                                                                                                                                         |
| <i>X. axonopodis</i> pv. <i>phaseoli</i>       | <i>cpn60</i>  | 2                | AF426387.1;AY922370.1                                                                                                                                                                                                                                                              |
| <i>X. axonopodis</i> pv. <i>vesicatoria</i>    | <i>cpn60</i>  | 1                | AM039952.1                                                                                                                                                                                                                                                                         |
| <i>X. campestris</i> pv. <i>campestris</i>     | <i>cpn60</i>  | 5                | CP000050.1;AE008922.1;AM920689.1;CP012145.1;CP012146.1                                                                                                                                                                                                                             |
| <i>X. campestris</i> pv. <i>raphani</i>        | <i>cpn60</i>  | 1                | CP002789.1                                                                                                                                                                                                                                                                         |
| <i>X. fuscans</i> subsp. <i>fuscans</i>        | <i>cpn60</i>  | 1                | FO681494.1                                                                                                                                                                                                                                                                         |
| <i>X. oryzae</i> pv. <i>oryzae</i>             | <i>cpn60</i>  | 5                | CP013666.1;AE013598.1;AP008229.1;CP012947.1;CP007166.1                                                                                                                                                                                                                             |
| <i>X. oryzae</i> pv. <i>oryzicola</i>          | <i>cpn60</i>  | 9                | CP011955.1;CP011956.1;CP011957.1;CP011962.1;CP011958.1; CP011959.1; CP007221.1;CP011960.1;CP007810.1                                                                                                                                                                               |
| <i>X. sacchari</i>                             | <i>cpn60</i>  | 1                | CP010409.1                                                                                                                                                                                                                                                                         |
| <i>X. translucens</i> pv. <i>undulosa</i>      | <i>cpn60</i>  | 1                | CP008714.1                                                                                                                                                                                                                                                                         |
| <i>X. arboricola</i>                           | <i>avrBs2</i> | 3                | JQ387641.1; JQ425035.1; JQ387642.1                                                                                                                                                                                                                                                 |
| <i>X. arboricola</i> pv. <i>juglandis</i>      | <i>avrBs2</i> | 1                | CP012251.1                                                                                                                                                                                                                                                                         |
| <i>X. axonopodis</i> pv. <i>citri</i>          | <i>avrBs2</i> | 23               | CP004399.1; AE008923.1; CP011827.2; CP003778.1; CP009037.1; CP009034.1; CP009031.1; CP009028.1; CP009025.1; CP009022.1; CP009019.1; CP009016.1; CP009013.1; CP009010.1; CP009007.1; CP009004.1; CP009001.1; CP008998.1; CP008995.1; CP008992.1; CP008989.1; CP006857.1; CP009040.1 |
| <i>X. axonopodis</i> pv. <i>citrumelo</i>      | <i>avrBs2</i> | 1                | CP002914.1                                                                                                                                                                                                                                                                         |
| <i>X. axonopodis</i> pv. <i>dieffenbachiae</i> | <i>avrBs2</i> | 1                | CP014347.1                                                                                                                                                                                                                                                                         |
| <i>X. axonopodis</i> pv. <i>vesicatoria</i>    | <i>avrBs2</i> | 2                | AF114720.1; AM039952.1                                                                                                                                                                                                                                                             |
| <i>X. campestris</i> pv. <i>campestris</i>     | <i>avrBs2</i> | 6                | CP012145.1; CP012146.1; CP011946.1; AM920689.1; AE008922.1; CP000050.1                                                                                                                                                                                                             |
| <i>X. fragariae</i>                            | <i>avrBs2</i> | 3                | JQ387639.1; JQ387637.1; JQ387640.1                                                                                                                                                                                                                                                 |
| <i>X. fuscans</i> subsp. <i>fuscans</i>        | <i>avrBs2</i> | 1                | FO681494.1                                                                                                                                                                                                                                                                         |
| <i>X. oryzae</i> pv. <i>oryzae</i>             | <i>avrBs2</i> | 6                | AP008229.1; CP000967.2; CP013666.1; CP012947.1;AE013598.1; CP007166.1                                                                                                                                                                                                              |
| <i>X. oryzae</i> pv. <i>oryzicola</i>          | <i>avrBs2</i> | 12               | CP007810.1; CP003057.2; CP011955.1; CP011956.1; CP011957.1; CP011958.1; CP011959.1; CP011960.1; CP011961.1; CP011962.1; DQ641035.1; CP007221.1                                                                                                                                     |
| <i>X. albilineans</i>                          | <i>gyrB</i>   | 5                | EU498963.1; EU498985.1; EU267171.1; FP565176.1; EU499030.1                                                                                                                                                                                                                         |
| <i>X. populi</i>                               | <i>gyrB</i>   | 2                | EU499016.1; EU499016.1                                                                                                                                                                                                                                                             |
| <i>X. albilineans</i>                          | 16S rDNA      | 6                | AB248373.1; AB248372.1; AB248371.1; AB248370.1; KU726266.1; NR_026316.1                                                                                                                                                                                                            |
| <i>X. populi</i>                               | 16S rDNA      | 1                | NR_026320.1                                                                                                                                                                                                                                                                        |

<sup>a</sup> The number of the gene sequences obtained from GenBank.
